EDITORIAL

# *PLOS Computational Biology* 2015 Reviewer Thank You

The Public Library of Science (PLOS) and the *PLOS Computational Biology* editorial team would like to express our tremendous gratitude to all those individuals who participated in the peer review process this past year at *PLOS Computational Biology*. As a journal that is run by and for the scientific community, we depend upon you, the community, to communicate our best work. 2015 was great year for *PLOS Computational Biology*; during the year, over 2,600 reviewers from around the world helped evaluate over 970 articles.

The names of our 2015 reviewers are listed in [S1 Reviewer List](#). Thank you to all our reviewers for sharing your expertise with the *PLOS Computational Biology* authors. Your efforts are an important part of making the journal a highly valued Open Access resource created by and for the benefit of the scientific community.

## Supporting Information

**S1 Reviewer List. Alphabetical list of 2015 *PLOS Computational Biology* reviewers.**  
(PDF)

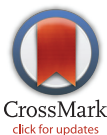

## Reference

1. (2015) PLOS Computational Biology 2014 Reviewer Thank You. PLoS Comput Biol 11(2): e1004184. doi: [10.1371/journal.pcbi.1004184](https://doi.org/10.1371/journal.pcbi.1004184)

## OPEN ACCESS

**Citation:** (2016) *PLOS Computational Biology* 2015 Reviewer Thank You. PLoS Comput Biol 12(2): e1004815. doi:10.1371/journal.pcbi.1004815

**Published:** February 23, 2016

**Copyright:** © 2016 The PLOS Computational Biology Staff. This is an open access article distributed under the terms of the [Creative Commons Attribution License](#), which permits unrestricted use, distribution, and reproduction in any medium, provided the original author and source are credited.

**Funding:** The author(s) received no specific funding for this work.

**Competing Interests:** The authors have declared that no competing interests exist.
